# Supplementary material for: Whole-exome sequencing in patients with protein aggregate myopathies reveals causative mutations associated with novel atypical phenotypes
Source: Springer Nature journal article supplement (doi:10.1007/s10072-020-04876-7), 2020-11-10
Supplement: MOESM2 [file 18572576]

## SUPPORTING INFORMATION

**Table S2** Selected variants of unknown significance (VUS)

| <b>Family Proband</b>                                | <b>Variant 1</b><br>(transcript)<br>genomic pos. hg19                                          | <b>Variant 2</b><br>(transcript)<br>genomic pos. hg19                              | <b>Variant 3</b><br>(transcript)<br>genomic pos. hg19                               |
|------------------------------------------------------|------------------------------------------------------------------------------------------------|------------------------------------------------------------------------------------|-------------------------------------------------------------------------------------|
| <b>Family 1</b>                                      | <b>RBM20 p.(Val535Ile)</b><br>c.1603G>A<br>(NM_001134363.2)<br>chr10:112557341-G>A             | <b>DCTN1 p.(Ile196Val)</b><br>c.586A>G<br>(NM_004082.4)<br>chr2:074598723-T>C      | <b>MYH14 p.(Arg1858Cys)</b><br>c.5572C>T<br>(NM_001145809.2)<br>chr19:050805020-C>T |
| II-2 (A)                                             | +                                                                                              | +                                                                                  | +                                                                                   |
| III-3 (A)                                            | -                                                                                              | +                                                                                  | +                                                                                   |
| II-5 (DP)                                            | -                                                                                              | NT                                                                                 | -                                                                                   |
| <b>ACMG Classification*</b><br>(identified criteria) | <b>Likely Benign</b><br>(PP3, PP5, BS2, BP1)                                                   | <b>Benign</b><br>(BS1, BS2, BP1, BP4, BP6)                                         | <b>Likely Benign</b><br>(PP3, BS2, BP1)                                             |
| <b>Family 2</b>                                      | <b>TRIM63 p.(Met14SerfsTer38)</b><br>c.35_38dupATCC<br>(NM_032588.3)<br>chr1:026393947-G>GGGAT | <b>TTN p.(Ser30125Phe)</b><br>c.90374C>T<br>(NM_001256850.1)<br>chr2:179410666-G>A | <b>ACTC1 p.(Ile371Thr)</b><br>c.1112T>C<br>(NM_005159.4)<br>chr15:035082635-A>G     |
| II-1 (A)                                             | +                                                                                              | +                                                                                  | +                                                                                   |
| II-2 (U)                                             | -                                                                                              | +                                                                                  | -                                                                                   |
| <b>ACMG Classification*</b><br>(identified criteria) | <b>Uncertain Significance</b><br>(PM2)                                                         | <b>Benign</b><br>(PP3, BS1, BS2, BP1, BP6)                                         | <b>Uncertain Significance</b><br>(PM2, PP3)                                         |

A, affected; U, unaffected; DP, patient affected by myopathy with divergent phenotype; NT, not tested  
 \*verdict and identified ACMG criteria are based on Varsome database; PS/PM/PP – pathogenic strong/moderate/supporting; BS/BP – benign strong, supporting.
